# Supplementary material for: Geospatial Modeling of 1-Hour and 2-Hour Access to Surgical Care in Uganda: A National Scale-Up Analysis
Source: Research Square preprint supplement (doi:10.21203/rs.3.rs-7892115/v1), 2025-10-21
Supplement: Supplementary file 1 [file 55505660e907e0c0644ca516.docx]

**Supplementary information**

### **Table S1 and S2: Travel Speeds Used in Accessibility Analysis[1] in the Unimodel and Bimodal models**

*Speeds (in km/h) assigned to different land cover classes and road types for the unimodal (walking only) and bimodal (walking + motorized transport) scenarios.*

#### **Table S1: Unimodal Scenario (Walking Only)**

| **Class** | **Label** | **Speed (km/h)** | **Mode** |
| --- | --- | --- | --- |
| 0 | Not available | 0.0 | Walking |
| 20 | Shrubs | 3.5 | Walking |
| 30 | Herbaceous vegetation | 3.5 | Walking |
| 40 | Cultivated and managed vegetation | 3.0 | Walking |
| 50 | Urban built-up | 4.0 | Walking |
| 60 | Bare sparse vegetation | 3.5 | Walking |
| 70 | Snow and Ice | 0.0 | Walking |
| 80 | Permanent water bodies | 0.0 | Walking |
| 90 | Herbaceous wetland | 0.5 | Walking |
| 112 | Closed forest evergreen broadleaf | 3.2 | Walking |
| 114 | Closed forest deciduous broadleaf | 3.2 | Walking |
| 116 | Closed forest unknown | 3.2 | Walking |
| 122 | Open forest evergreen broadleaf | 3.2 | Walking |
| 124 | Open forest deciduous broadleaf | 3.2 | Walking |
| 126 | Open forest unknown | 3.2 | Walking |
| 1012 | Residential | 4.0 | Walking |
| 1013 | Living street | 4.0 | Walking |
| 1014 | Service | 4.0 | Walking |
| 1015 | Track | 4.0 | Walking |
| 1016 | Pedestrian | 4.0 | Walking |
| 1017 | Path | 4.0 | Walking |
| 1018 | Footway | 4.0 | Walking |
| 1020 | Bridleway | 4.0 | Walking |
| 1021 | Cycleway | 4.0 | Walking |
| 1022 | Steps | 4.0 | Walking |
| 1023 | Unclassified | 40.0 | Motorized |

#### **Table S2: Bimodal Scenario (Walking + Motorized Transport)**

| **Class** | **Label** | **Speed (km/h)** | **Mode** |
| --- | --- | --- | --- |
| 0 | Not available | 0.0 | Walking |
| 20 | Shrubs | 3.5 | Walking |
| 30 | Herbaceous vegetation | 3.5 | Walking |
| 40 | Cultivated and managed vegetation | 3.0 | Walking |
| 50 | Urban built-up | 4.0 | Walking |
| 60 | Bare sparse vegetation | 3.5 | Walking |
| 70 | Snow and Ice | 0.0 | Walking |
| 80 | Permanent water bodies | 0.0 | Walking |
| 90 | Herbaceous wetland | 0.5 | Walking |
| 112 | Closed forest evergreen broadleaf | 3.2 | Walking |
| 114 | Closed forest deciduous broadleaf | 3.2 | Walking |
| 116 | Closed forest unknown | 3.2 | Walking |
| 122 | Open forest evergreen broadleaf | 3.2 | Walking |
| 124 | Open forest deciduous broadleaf | 3.2 | Walking |
| 126 | Open forest unknown | 3.2 | Walking |
| 1000 | Trunk road | 80.0 | Motorized |
| 1001 | Trunk link | 65.0 | Motorized |
| 1002 | Primary road | 54.0 | Motorized |
| 1003 | Primary link | 54.0 | Motorized |
| 1004 | Motorway | 100.0 | Motorized |
| 1005 | Motorway link | 80.0 | Motorized |
| 1006 | Secondary road | 51.0 | Motorized |
| 1007 | Secondary link | 41.0 | Motorized |
| 1008 | Tertiary road | 33.0 | Motorized |
| 1009 | Tertiary link | 33.0 | Motorized |
| 1010 | Road | 30.0 | Motorized |
| 1012 | Residential | 4.0 | Walking |
| 1013 | Living street | 4.0 | Walking |
| 1014 | Service | 4.0 | Walking |
| 1015 | Track | 4.0 | Walking |
| 1016 | Pedestrian | 4.0 | Walking |
| 1017 | Path | 4.0 | Walking |
| 1018 | Footway | 4.0 | Walking |
| 1020 | Bridleway | 4.0 | Walking |
| 1021 | Cycleway | 4.0 | Walking |
| 1022 | Steps | 4.0 | Walking |
| 1023 | Unclassified | 4.0 | Walking |


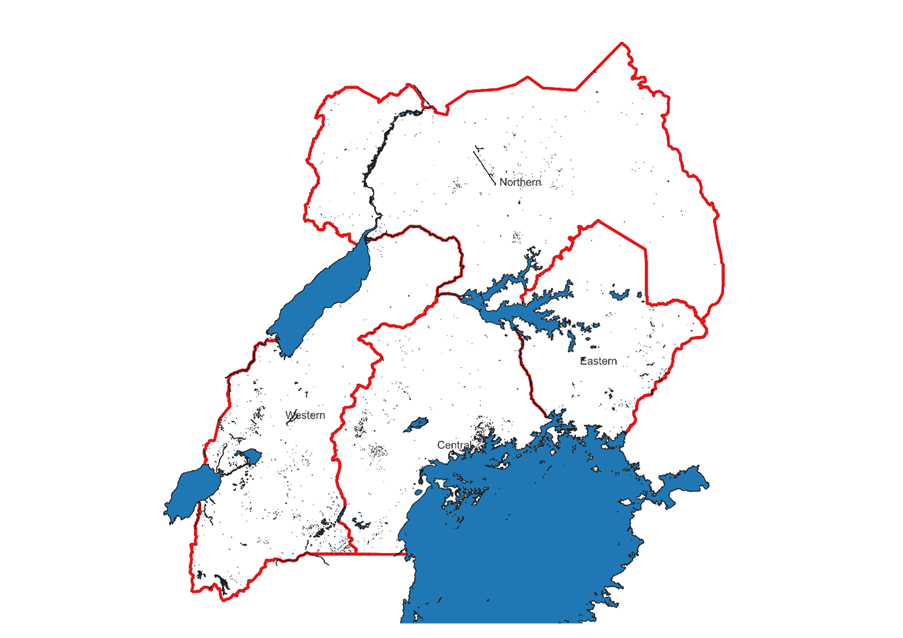


Supplementary Figure S1. Administrative boundaries of Uganda, showing the four regions (Central, Eastern, Northern, and Western) used for stratified analysis.


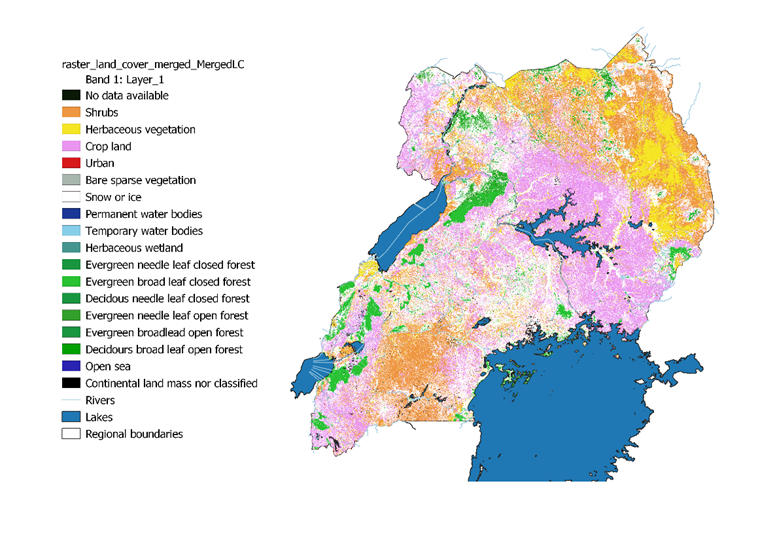


Supplementary Figure S2. Land cover classification of Uganda (100 m resolution) from the Copernicus Global Land Service.


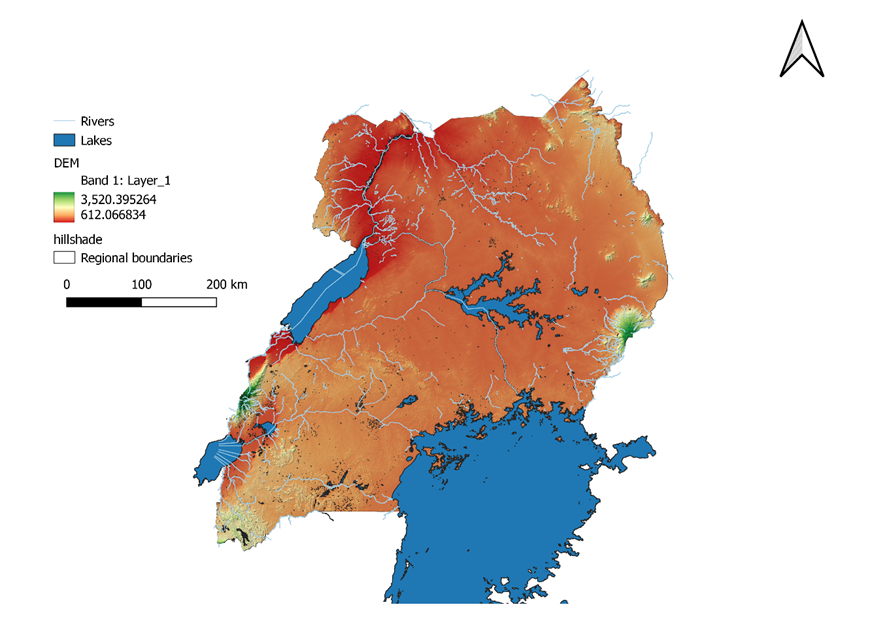


Supplementary Figure S3. Digital Elevation Model (DEM) of Uganda from the Shuttle Radar Topography Mission (SRTM), resampled to 100 m resolution.


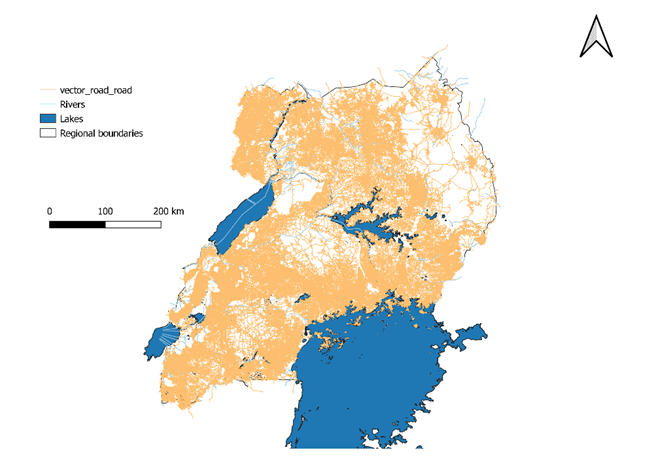


Supplementary Figure S4. Road network of Uganda extracted from OpenStreetMap (2024 build), including trunk, primary, secondary, tertiary, and minor roads.


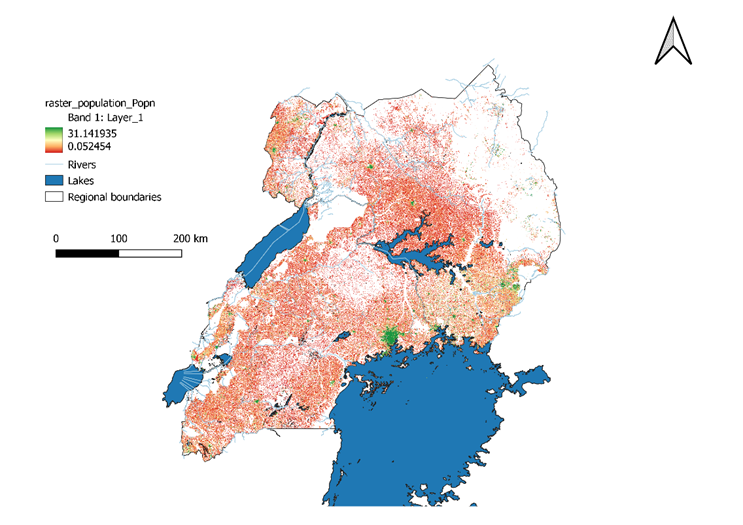


Supplementary Figure S5. Population distribution of Uganda (WorldPop 2020 constrained dataset), displayed at 100 m resolution.


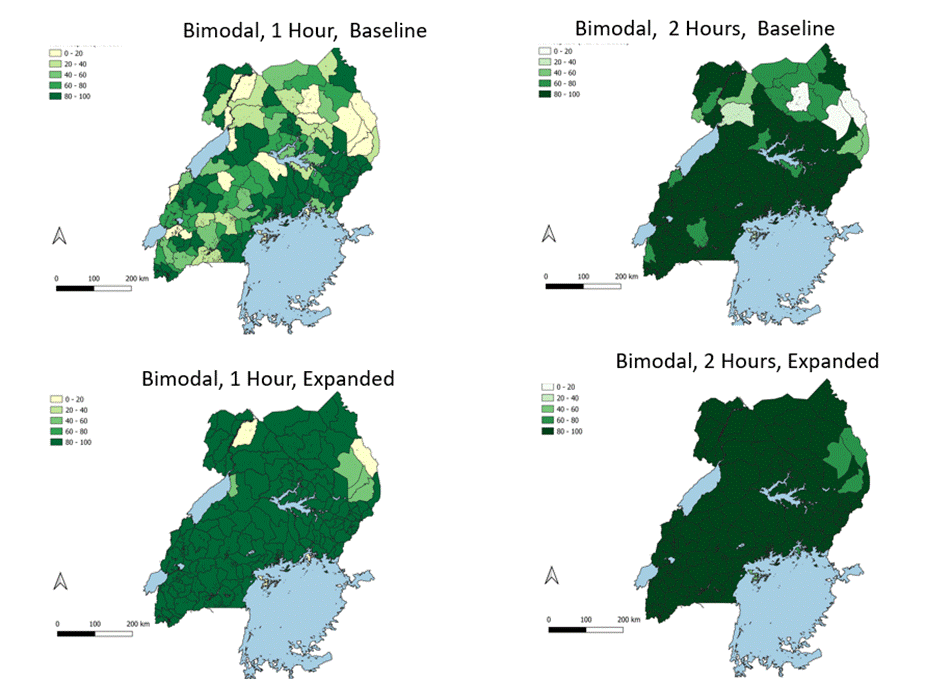


Figure S6: A visual representation of the bimodal model, looking at % Population coverage within 1 hours and 2 hours, with (expanded scenario) and without Health Center IVs (only main hospitals) included
